# Supplementary material
Source: Elsevier journal article supplement (https://www.sciencedirect.com/science/article/pii/S1138359319303739)
Supplement: mmc1 [file S1138359319303739:mmc1.docx]

**Comité Científico:**

Alfonso Barquilla García; Ángel Díaz Rodríguez; Carlos Escobar Cervantes; Francisco Javier Alonso Moreno; Gustavo Cristóbal Rodríguez Roca; Jesús Vergara Martín; José. Luis Llisterri Caro; Juan José Badimón; José Polo García; Luis Rodríguez Padial; Miguel Ángel Prieto; Rafael Vidal Pérez; Sergio Cinza Sanjurjo; Sonia Miravet Jiménez; Sonsoles Velilla Zancada

**Andalucía:**

Antonio López Téllez, Jesus Vergara Martin, Maria De Los Angeles Ortega Osuna, Cristóbal Prieto Cid, Mª José Hidalgo Fajardo, Jose Lorente Serna, Ángel Domínguez Requena, Ricardo Alberola Cañizares, Manuel Ruiz Peña, Filomena Herrero Collado, Marcela Montes Vázquez, Rafael Ángel Carrascal Garrido, Maria Reyes Herrera Lozano, Beatriz Ortiz Oliva, Francisco José Anguita, Carmen Pérez Ibáñez, Carlos Alberto Cabrera Rodríguez, Maria Jose Cruz Rodríguez, Sandra Bonilla Ruiz, Rocio Reina Gonzalez, Salome Abad Sanchez, Inmaculada Santana Martinez, Rafael Sanchez Jordán, Juan Mª Ramos Navas-Parejo, Jose Manuel Ramirez Torres, Jose Maria Beltran Poveda, Maria Adoración De Cruz Benayas, Carmen Fernandez Gil, Jon Iñaki Esturo Alcaine, Antonio Mora Quintero, Fernando Leiva Cepas, José Luis Carrasco Martín, Emilio Garcia Criado, Mercedes Vazquez Blanco, Isabel Mora Ortiz, Leovigildo Ginel Mendoza, Juan Carlos Aguirre Rodriguez, Esperanza María Romero Rodríguez, Jose Acevedo Vazquez, Juan Gabriel García Ballesteros, María De La Paz Fernández Lara, Patricia Agüera Moreno, Eduardo Paños Maturana, Juan Manuel Ignacio Expósito, Noelia Carrillo Peñas, Carmen María Abad Faya, Ana Marina Almagro Duque, Rubén Torrescusa Camisón, Paloma Menéndez Polo, Marina Peña García, Cristina Lopez Fernández, Ascensión Estepa Torres, Miguel Gutiérrez Jansen, Esperanza Loizaga González, Lisardo Garcia Matarin, Enrique José Gamero De Luna, Javier Benítez Rivero, Maria Jose Gomez Gonzalez, Carmen Gómez Montes.

**Aragón**

Eva Trillo Calvo, Concepción Bayod Calvo, Susana Larripa De La Natividad, German Grasa Lambea, Emilio Jimenez Marin, Ana Cristina Navarro Gonzalvo, Antonio Pablo Martinez Barseló, Irene Peña León.

**Cantabria**

E. Lidia Gutiérrez Fernández, Fernando Andrés Mantecón, Ana Belen Garcia Garrido, Asuncion Velez Escalante, Luisa Alonso Rentería, Jesús Sainz Jiménez, Guillermo Pombo Alles.

**Castilla La Mancha**

Juan Antonio Divison Garrote, Pedro Martinez Sotodosos, Juan Antonio Vivancos Fuster, María García Palencia, José Ambrosio Torres Moraleda, Sara González Ballesteros, Ana Carmen Gil Adrados, Antonio González Cabrera, Miguel Angel Babiano Fernandez, Guillermo Rico García, Juan Jose Criado-Alvarez, Pilar Torres Moreno, Francisco Javier Arribas Aguirregaviria, Alicia Sahuquillo Martinez, Lourdes Maria Santos Bejar, Miguel Laborda Peralta, Raul Piedra Castro, Carlos Santos Altozano, Lucia Gonzalez-Tarrio Polo, Pedro Valiente Maresca, Reinilda Mota Santana, Noemi Elizabeth Terrero Ledesma, Noelia Garrido Espada, Francisco Javier Alonso Moreno, Gabriela Delia Rosa Zambrana Calvi.

**Castilla y León**

Juan Lorenzo Gutierrez Montero, Juan Ignacio López Gil, Maria Dolores Fernández Ortega, Miren Elizari Roncal, María Ascensión López Serrano, Nuria Esther Adrian De La Fuente, Belén Angulo Fdez. De Larrea, Naiara Cubelos Fernández, Guiomar Luz Ferreiro Gómez, Diana Gomez Rodriguez, Sonia Maria Andres Tuñon, María Ajenjo González, Serafin De Abajo Olea, Juan Jose Leon Regueras, César Manuel Gallego Nieto, Delio Vazquez Mallada, Maria De La O Gutierrez Garcia, Pablo Baz Rodriguez, José Ignacio Ferradal García, Blanca Delia De Román Martínez, Ana Arconada Perez, Omar Mahmoud Atoui, Álvaro Morán Bayón, María Teresa Armenteros Del Olmo, Fco Javier Garcia-Norro Herreros, Enrique Méndez Rodríguez, Diana María Narganes Pineda, Angel Diaz Rodriguez, Verónica Ortiz Ainaga, Milagros Sonlei Sánchez Guevara, Laura Villota Ferreiro, M Teresa Grande Grande, Francisco Vicente Martínez Gracía.

**Cataluña**

Maria Dolores Moriano Garcia, Beatriz Jiménez Muñoz, Gemma Rovira Marcelino, Diana Elizabeth Fernandez Valverde, Roser Rodó Bernadó, Maria Teresa Ortiz Lupiañez, Najlaa Najih, Jose Maria Dieguez Parra, Mª Rosa Benedicto Acebo, Mari Luz Bravo Vicien, Alberto Ramón León Estella, Juan Antonio Muñoz Gómez, Alicia Mostazo Muntané, Isabel Ortega Abarca, Anna Gasol Fargas, Brenda Elizabeth Riesgo Escudero, Susana Elizabeth Riesgo, Edgar Zaballos Castellvi, Celia Cols Sagarra, Marta Herranz Fernández, Josep Alins Presas, Idaira Damas Pérez, Rosa M Alcolea Garcia, Ines Monte Collado, Roberto Genique Martínez, María José Guasch Villanueva, Sònia Miravet Jiménez, Teresa Rama Martinez, Lucio Pinto Pena, Josefa Maria Panisello Royo, Ines Gil Gil.

**Comunidad de Madrid**

Alberto Calderon Montero, María Del Mar Zamora Gómez, Elena Alarcón Cebrián, Mª Jose Piñero Acin, Celia Pecharroman Sacristan, M Soledad Mayayo Vicente, Mª Paz Pérez Unanua, Nuria Marañon Henrich, Saray Gómez Monreal, Sonia Redondo De Pedro, Blanca Sanz Pozo, Irene Moreno Martinez, Beatriz Lopez Uriarte, Carmelina Sanz Velasco, Amaya Gárriz Aguirre, Montserrat Rivera Teijido, German Reviriego Jaen, Jose Ignacio Aza Pascual-Salcedo, Josefa Vázquez Gallego, Julia Caballer Rodilla, Aida Herrera, Ezequiel Arranz Martínez, Ana María Gómez Calvo, Paula Morán Oliva, Mª Milagros González Béjar, Julio Antonio Heras Hitos, Olga Garcia Vallejo, Manuel De Jesús Frías Vargas, Maria Jesus Castillejo Boguerin, Aurora Garcia Lerin, Miguel Angel María Tablado, Elena Concepción García García, Leticia De Miguel Acero, Carmen Zárate Oñate, Aránzazu Barranco Apoita, María Ester Montes Belloso, Ana Maria Huertas Velasco, Rafael Sáez Jiménez, Julia Natividad Garcia Pascual, María Clemencia Zuluaga Zuluaga, Mª Cruz Díez Perez, Antonio Ruiz García, Cristina Murillo Jelsbak, Virginia Lasso Oria, Amelia Gonzalez Gamarra.

**Comunidad Valenciana**

Vicente Pascual Fuster, Mª Dolores Aicart Bort, Natividad Vázquez Gómez, Carlos Lluna Gasco, Teresa Amoros Barber, Pedro Antonio Medina Cano, Miguel Monteagudo Moncho, Mª Jesús Larré Muñoz, Raquel Navarro Hernández, Francisco Jose Martinez Egea, Antonio Tramontano, Marta Ferrer Royo, Belén Persiva Saura, Juan A. Contreras Torres, José Mª Tirado Moliner, Alejandro Salanova Penalba, Ariadna Cucó Alberola, Fernando Maria Navarro I Ros, Enrique Beltran Llicer, Ana Seoane Novás, Inmaculada Martín Valls, Gracia Verdú Mahiques, Enrique Peña Forcada, Nieves Aguilar Gómez, Francisco Javier Sanz García, M Dolores Paradís Bueso, María Eugenia Alegre Romero, Antonio Francés Camus, María Amparo Anton Peinado, Rosa Latorre Santos, Mª Asuncion Palomar Marin, Maria Carmen Botella Garcia, Eva Sánchez Fresquet, Pedro Sala Paños, Tomás Sánchez Ruiz, Rosa Ana Valero Valero, Maria Seoane Vicente, Magdalena Martin Llinares, Antonio Masiá Alegre, José Luis Llisterri Caro, Irene Lluch Verdu, Vicente Pallares Carratala, Francisco Valls Roca, Rafael Manuel Micó Pérez.

**Extremadura**

Jacinto Espinosa García, Jose Ignacio Prieto Romo, Leandro Fernandez Fernández, Javier Sierratapia, Nieves Moreno Regidor, Francisco Javier Zaballos Sanchez, Ana Moreno Moreno, Francisco Carramiñana Barrera, Juan Jose Torres Vazquez, Maria José Gamero Samino, Miguel Angel De Santiago Rodriguez, Pablo Rafael Gómez Martínez, Antonio Carlos Elias Becerra, Javier Soto Olivera, Víctor Cambero, Julián Domínguez Ávila, Andrés Simón Fuentes, Jorge Manuel De Nicolas Jimenez, Dimas Igual Fraile, Guadalupe Nieto Barco, Ignacio Araujo Ramos, Mª Luz Serrano Berrocal, Francisco Buitrago Ramírez, Minerva Gallego Marcos, Felix Suarez Gonzalez, Victoriano Chavero Carrasco, José Polo García, Francisco Guerra Peguero, Francisco Javier Sanchez Vega, Manuel Tejero Mas, Alba Palmerín Donoso, Miguel Turégano Yedro, María Beatriz Esteban Rojas, Fátima Cabezudo Moreno, Nawson Elver Quevedo Saldaña, Maria Del Mar García Fenés, Alfonso Barquilla Garcia, Timotea Garrote Florencio, Jose Maria Fernandez Toro.

**Galicia**

Alejandra Rey Rañal, Elena García Del Río, Enrique Nieto Pol, Julio Álvarez Fernández, Pilar Alonso Álvarez, Mª Luisa Jorge Gómez, Antonio Calvo Guerrero, Isabel Celemín Colomina, Lucia Barreiro Casal, Juana Fernandez Moreno, Mª Angelines Carballal Martinez, Nabor Diaz Rodriguez, Carlos Moral Paredes, Dolores Recarey García, Fco Javier Iglesias Mato, Antonio Fouz Ulloa, Amparo Fidalgo Gonzalez, Noelia Dios Parada, Patricia Conde Sabarís, Ana Isabel Rodriguez Pérez, Ana Inés García Palacio, Victor Julio Quesada Varela, Lidia Romero Iglesias, Ángel Lado Llerena, Carmen Lires Rodríguez, Maria Luisa Carretero Diaz, José Carreira Arias, Jose Luís Vázquez Camino, Maria Del Carmen Torreiro Penas, Sandra Yáñez Freire, Sergio Cinza Sanjurjo, Daniel Rey Aldana, Carlos Piñeiro Díaz.

**Illes Balears**

Fernando García Romanos, Antonia Moreno Gonzalez, Maria Lara Amengual Sastre, Susana Martinez Palli, Jose Alfonso Ramon Bauza, Jose Ortiz Bolinches, Carmen Fernandez Fernández, Maria Isabel Orlandis Vázquez, Ana Sanchis Mezquita, Fernando Unceta Aramburu, Juan Fernando Peiró Morant, Ana Moyá Amengual.

**Islas Canarias**

Isidro Godoy Garcia, Fernando Rubio Sevillano, María Isabel González González, Marta Perez Souto, Raquel De León Contreras, Sara Isabel Almeida González, Irene Almería Diez, Virginia Maria Mirabal Sánchez, Francisco Jose Escobar Lavado, Yoel Anta Pérez, Nayra Sánchez Hernández, Juan Luis Alonso Jerez, Ricardo Koch, Nayra Ramirez Mendoza, Héctor Suárez Hernández, Francisco Jesús Morales Escobar.

**La Rioja**

Sonsoles María Velilla Zancada, Rafael Crespo Sabarís, Oscar Fernando Isaula Jimenez.

**Melilla**

Jesus Manuel Gonzalez Puga, Jorge Antonio Benaín Ávila, Óscar Del Toro González.

**Navarra:**

Laura Sánchez Iñigo, Ines Sanz Perez

**País Vasco**

Jose Felix Zuazagoitia Nubla, Ana Echebarría Ituiño, Gregorio Mediavilla Tris, María Carmen Noriega Bosch, Esther Gonzalez, Maria Luisa Ruiz Macho, Ruth Sendino Del Olmo, Asunción Olagorta De Prado, Ana López De Viñaspre Muguerza, Jesus Iturralde Iriso.

**Principado de Asturias**

María José Pérez Martínez, Ana Piera Carbonell, Margarita Alonso Fernández, María Montserrat Rueda Cuadrado, Rodrigo Abad Rodríguez, José Miguel Alvarez Cabo, Rubén Sánchez Rodríguez, Eva Maria Cano Cabo, Anny Romero Secin, Miguel Ángel Prieto Diaz, Juan Jesús García Fernández.

**Región de Murcia**

Vicente Llorca Bueno, Ana María Ballesteros Pérez, Domingo J. Rubira López, Mª Dolores Esteve Franco, Elena Sánchez Pablo, Maria Teresa Palacios Lopez, Juan Castillo Meroño, José Maria Lobo Martinez, Isabel Maria Peral Martinez, J. Eduardo Carrasco Carrasco, Armando Santo Gonzalez.
